# Supplementary material for: Knowledge, Attitudes, and Practices of Healthcare Professionals Regarding Psoriasis Biologic Therapy
Source: Research Square preprint supplement (doi:10.21203/rs.3.rs-7683165/v1), 2026-02-02
Supplement: Supplementary file 1 [file 10de254709744d2ecce7c92c.docx]

| **Questionnaire Number**： |
| --- |
| Dear Doctor,  We are researchers from Bijie First People's Hospital, inviting you to participate in our research project. This study aims to understand the awareness, attitudes, and practices of medical staff towards the use of biologic therapies for psoriasis, providing a basis for developing scientific intervention strategies that may help improve the health of more people in the future. Your participation in this study is voluntary, and it has been approved by the Ethics Review Committee. If you agree to participate, please refer to the following instructions:  1. Please complete the questionnaire. There are no right or wrong answers; you just need to fill in according to your actual situation. If you have any questions during the process, please feel free to ask us, and please submit it promptly after completion.  2. This study is a simple questionnaire survey that will not cause any physical or psychological harm. However, it will involve some privacy issues, such as your gender and age. We will strictly maintain confidentiality and will not disclose your information. Please rest assured when filling it out.  3. As a participant, you can always be informed about the information and progress related to this study. If you decide to withdraw from the study, please inform us, and your data will not be included in the research results.  Finally, we sincerely thank you for taking the time to support our scientific research amidst your busy schedule!  □ I have been informed and agree to use the collected data for scientific research.  Signature of informed consent:  Date of participation: Year Month Day |

| **Part One: Basic Information** | | |
| --- | --- | --- |
| 1. Your gender: | a. Male | b. Female |
| 2. Your age: (Please enter only numbers. It would be helpful if the questionnaire could set up number verification for integers.) | | |
| 3. Your ethnicity: | a. Han nationality  b. Ethnic minority | |
| 4. Your educational level: | a. High school/Technical Secondary School  b. Bachelor's degree/college diploma  c. Master's degree  d. Doctoral degree or above | |
| 5. Department you work in: | a. Dermatology  b. Internal medicine  c. Surgery  d. Gynecology  e. Pediatrics  f. Otolaryngology  g. Infectious diseases  h. Medical technology department  f. Other departments | |
| 6. Your professional title: | a. Medical student  b. Junior (including resident physicians, nursing supervisors, junior technicians, etc.)  c. Intermediate (including attending physicians, chief nursing officers, chief technicians, etc.)  d. Associate senior (including associate chief physicians, associate chief nursing officers, associate chief technicians, etc.)  e. Senior (including chief physicians, chief nursing officers, chief technicians, etc.) | |
| 7. Hospital grade where you work: | a. Provincial/ministerial level  b. Municipal level  c. County level  d. Township and below | |
| 8. Do you have any relatives who have had psoriasis? | a. Yes  b. No | |
| 9. Do you have any experience in treating psoriasis? (Including treating yourself or treating patients) | a. Yes  b. No | |
| 10. Have you used biologic therapies to treat diseases? (Including treating yourself or treating patients) | a. Yes  b. No | |
| 11. Which of the following biologic therapies do you have knowledge of? (Multiple choice) | a. TNF-α inhibitors  b. IL-17A inhibitors  c. IL-12/23 inhibitors  d. IL-23 inhibitors  e. Other  f. Completely unaware | |
| 12. What is your primary source of knowledge about psoriasis? (Multiple choice) | a. Professional studies  b. Clinical practice  c. News media  d. Social interactions  e. Unaware | |
| 13. How would you prefer to learn about biologic therapies for psoriasis? (Multiple choice) | a. Researching information myself  b. Offline seminars  c. Online seminars  d. Online courses  e. WeChat official account posts  f. Participating in case discussions  g. Other | |

| **Part Two: Awareness of Psoriasis and Its Treatment** | | | |
| --- | --- | --- | --- |
| **The following statements, indicate your level of understanding:** | | | |
| 1. Psoriasis is an immune-mediated chronic, relapsing, inflammatory, and systemic disease triggered by a combination of genetic and environmental factors. | a. True | b. False | c. Unclear |
| 2. Psoriasis is not contagious. | a. True | b. False | c. Unclear |
| 3. Psoriasis is difficult to treat and often becomes a lifelong condition. | a. True | b. False | c. Unclear |
| 4. Psoriasis is significantly associated with various diseases such as cardiovascular disease, diabetes, hypertension, and metabolic syndrome. | a. True | b. False | c. Unclear |
| 5. The treatment principle for psoriasis is standardised, safe, and individualised. | a. True | b. False | c. Unclear |
| 6. Biologic agents have a good overall safety profile, with a low risk of serious infections and tumours. | a. True | b. False | c. Unclear |
| 7. Standardised treatment with biologic agents for psoriasis should consider simultaneously clearing skin lesions, improving patient quality of life, screening and managing psoriasis comorbidities, and ensuring medication safety. | a. True | b. False | c. Unclear |
| 8. Early initiation of biologic therapy for psoriasis not only brings short-term efficacy but also long-term benefits. | a. True | b. False | c. Unclear |
| 9. Early initiation of biologic therapy can reduce the risk of psoriasis recurrence after discontinuation of treatment. | a. True | b. False | c. Unclear |
| 10. Psoriasis patients should abstain from alcohol. | a. True | b. False | c. Unclear |
| 11. The use of biologic agents does not affect women planning pregnancy. | a. True | b. False | c. Unclear |
| 12. Biologic agents can be a primary treatment method for paediatric psoriasis. | a. True | b. False | c. Unclear |
| 13. Hepatitis B virus carriers can use biologic agents to treat psoriasis. | a. True | b. False | c. Unclear |
| 14. Obesity does not affect the sensitivity of biologic therapy for psoriasis. | a. True | b. False | c. Unclear |
| 15. Smoking and alcohol consumption do not affect the sensitivity of biologic therapy for psoriasis. | a. True | b. False | c. Unclear |
| 16. Common adverse reactions to biologic agents include infusion reactions, upper respiratory tract infections, viral infections (such as influenza, herpes virus infections), headache, nausea, diarrhea, and abdominal pain. | a. True | b. False | c. Unclear |

| **Part Three: Attitude Towards Biologic Treatment for Psoriasis** | | | | | |
| --- | --- | --- | --- | --- | --- |
| 1. I believe biological therapy is an effective method for treating psoriasis. [P] | a.Strongly agree | b. Agree | c. Neutral | d. Disagree | e. Strongly disagree |
| 2. I believe biological therapy can improve the quality of life for psoriasis patients. [P] | a.Strongly agree | b. Agree | c. Neutral | d. Disagree | e. Strongly disagree |
| 3. I consider biological therapy for psoriasis treatment to be safe and reliable. [P] | a.Strongly agree | b. Agree | c. Neutral | d. Disagree | e. Strongly disagree |
| 4. I think patients are highly receptive to biological therapy treatment. [P] | a.Strongly agree | b. Agree | c. Neutral | d. Disagree | e. Strongly disagree |
| 5. I believe biological therapy for psoriasis has fewer side effects. [P] | a.Strongly agree | b. Agree | c. Neutral | d. Disagree | e. Strongly disagree |
| 6. I believe the efficacy of biological therapy for psoriasis is better compared to traditional treatment methods. [P] | a.Strongly agree | b. Agree | c. Neutral | d. Disagree | e. Strongly disagree |
| 7. I am not very willing to recommend the use of biological therapy for treating psoriasis. [N] | a.Strongly agree | b. Agree | c. Neutral | d. Disagree | e. Strongly disagree |
| 8. I trust that biological therapy can reduce the recurrence rate of psoriasis in patients. [P] | a.Strongly agree | b. Agree | c. Neutral | d. Disagree | e. Strongly disagree |
| 9. I think biological therapy for psoriasis treatment may lead to long-term weakening of the immune system. [N] | a.Strongly agree | b. Agree | c. Neutral | d. Disagree | e. Strongly disagree |
| 10. I think biological therapy for psoriasis treatment may make patients' skin more fragile or sensitive. [N] | a.Strongly agree | b. Agree | c. Neutral | d. Disagree | e. Strongly disagree |

| **Part Four: Behaviours and Practices Regarding the Use of Biologic Treatment** | | | | | |
| --- | --- | --- | --- | --- | --- |
| **If you are responsible for patients with psoriasis:** |  |  |  |  |  |
| 1. I will proactively introduce biological therapy to patients with psoriasis. [P] | a.Strongly agree | b. Agree | c. Neutral | d. Disagree | e. Strongly disagree |
| 2. I am able to regularly monitor the progress of patients during biological therapy for psoriasis. [P] | a.Strongly agree | b. Agree | c. Neutral | d. Disagree | e. Strongly disagree |
| 3. I will provide detailed information and education about biological therapy for psoriasis to the respective patients. [P] | a.Strongly agree | b. Agree | c. Neutral | d. Disagree | e. Strongly disagree |
| 4. I will offer psychological support and counseling to patients with psoriasis to help them cope with emotional and psychological stress during treatment. [P] | a.Strongly agree | b. Agree | c. Neutral | d. Disagree | e. Strongly disagree |
| 5. I can collaborate with other professionals to develop comprehensive treatment plans, including biological therapy, to maximally improve the condition and quality of life of patients. [P] | a.Strongly agree | b. Agree | c. Neutral | d. Disagree | e. Strongly disagree |
| 6. I will provide patients with comprehensive information about the risks and side effects of biological therapy for psoriasis. [P] | a.Strongly agree | b. Agree | c. Neutral | d. Disagree | e. Strongly disagree |
| 7. I will actively participate in research and academic exchanges on biological therapy for psoriasis. [P] | a.Strongly agree | b. Agree | c. Neutral | d. Disagree | e. Strongly disagree |
| 8. I will encourage patients to actively participate in self-management and rehabilitation to enhance the effectiveness of biological therapy. [P] | a.Strongly agree | b. Agree | c. Neutral | d. Disagree | e. Strongly disagree |
| 9. I will continuously update my professional knowledge and skills regarding biological therapy for psoriasis. [P] | a.Strongly agree | b. Agree | c. Neutral | d. Disagree | e. Strongly disagree |
| 10. I will personalize the biological therapy treatment plan based on the specific circumstances and needs of patients. [P] | a.Strongly agree | b. Agree | c. Neutral | d. Disagree | e. Strongly disagree |

| **Thank you once again for participating in our survey. Your responses are invaluable to our future work!**  **Thank you for filling out our questionnaire！**  If you have any comments or suggestions regarding this survey, we would be honored to hear your voice.  Comments and Suggestions: [Optional]  In order for this survey to be effective and to facilitate future follow-up work, we would greatly appreciate it if you could provide your contact information.  Your Phone Number: [Optional] |
| --- |
