# Supplementary material for: Knowledge, Attitudes, and Practices of Healthcare Professionals Regarding Psoriasis Biologic Therapy
Source: Research Square preprint supplement (doi:10.21203/rs.3.rs-7683165/v1), 2026-02-02
Supplement: Supplementary file 2 [file 3785436c6daf0fba620cce8f.docx]

**Supplement Table 1. Distribution of knowledge dimension responses**

|  | **True** | **False** | **Unclear** |
| --- | --- | --- | --- |
| 1. Psoriasis is an immune-mediated chronic, relapsing, inflammatory, and systemic disease triggered by a combination of genetic and environmental factors. | 496 (89.21) | 8 (1.44) | 52 (9.35) |
| 2. Psoriasis is not contagious. | 391 (70.32) | 100 (17.99) | 65 (11.69) |
| 3. Psoriasis is difficult to treat and often becomes a lifelong condition. | 453 (81.47) | 40 (7.19) | 63 (11.33) |
| 4. Psoriasis is significantly associated with various diseases such as cardiovascular disease, diabetes, hypertension, and metabolic syndrome. | 434 (78.06) | 37 (6.65) | 85 (15.29) |
| 5. The treatment principle for psoriasis is standardised, safe, and individualised. | 495 (89.03) | 6 (1.08) | 55 (9.89) |
| 6. Biologic agents have a good overall safety profile, with a low risk of serious infections and tumours. | 383 (68.88) | 41 (7.37) | 132 (23.74) |
| 7. Standardised treatment with biologic agents for psoriasis should consider simultaneously clearing skin lesions, improving patient quality of life, screening and managing psoriasis comorbidities, and ensuring medication safety. | 465 (83.63) | 7 (1.26) | 84 (15.11) |
| 8. Early initiation of biologic therapy for psoriasis not only brings short-term efficacy but also long-term benefits. | 431 (77.52) | 12 (2.16) | 113 (20.32) |
| 9. Early initiation of biologic therapy can reduce the risk of psoriasis recurrence after discontinuation of treatment. | 404 (72.66) | 22 (3.96) | 130 (23.38) |
| 10. Psoriasis patients should abstain from alcohol. | 475 (85.43) | 13 (2.34) | 68 (12.23) |
| 11. The use of biologic agents does not affect women planning pregnancy. | 199 (35.79) | 182 (32.73) | 175 (31.47) |
| 12. Biologic agents can be a primary treatment method for paediatric psoriasis. | 267 (48.02) | 100 (17.99) | 189 (33.99) |
| 13. Hepatitis B virus carriers can use biologic agents to treat psoriasis. | 273 (49.10) | 100 (17.99) | 183 (32.91) |
| 14. Obesity does not affect the sensitivity of biologic therapy for psoriasis. | 185 (33.27) | 197 (35.43) | 174 (31.29) |
| 15. Smoking and alcohol consumption do not affect the sensitivity of biologic therapy for psoriasis. | 113 (20.32) | 323 (58.09) | 120 (21.58) |
| 16. Common adverse reactions to biologic agents include infusion reactions, upper respiratory tract infections, viral infections (such as influenza, herpes virus infections), headache, nausea, diarrhea, and abdominal pain. | 400 (71.94) | 31 (5.58) | 125 (22.48) |

**Supplement Table 2. Distribution of attitude dimension responses**

|  | **Strongly agree** | **Agree** | **Neutral** | **Disagree** | **Strongly disagree** |
| --- | --- | --- | --- | --- | --- |
| 1. I believe biological therapy is an effective method for treating psoriasis. | 296 (53.24) | 123 (22.12) | 108 (19.42) | 12 (2.16) | 17 (3.06) |
| 2. I believe biological therapy can improve the quality of life for psoriasis patients. | 299 (53.78) | 142 (25.54) | 85 (15.29) | 14 (2.52) | 16 (2.88) |
| 3. I consider biological therapy for psoriasis treatment to be safe and reliable. | 257 (46.22) | 151 (27.16) | 123 (22.12) | 12 (2.16) | 13 (2.34) |
| 4. I think patients are highly receptive to biological therapy treatment. | 214 (38.49) | 158 (28.42) | 156 (28.06) | 14 (2.52) | 14 (2.52) |
| 5. I believe biological therapy for psoriasis has fewer side effects. | 216 (38.85) | 166 (29.86) | 140 (25.18) | 20 (3.60) | 14 (2.52) |
| 6. I believe the efficacy of biological therapy for psoriasis is better compared to traditional treatment methods. | 240 (43.17) | 181 (32.55) | 109 (19.60) | 12 (2.16) | 14 (2.52) |
| 7. I am less willing to recommend the use of biological therapy for treating psoriasis. | 75 (13.49) | 41 (7.37) | 169 (30.40) | 117 (21.04) | 154 (27.70) |
| 8. I trust that biological therapy can reduce the recurrence rate of psoriasis in patients. | 232 (41.73) | 163 (29.32) | 129 (23.20) | 17 (3.06) | 15 (2.70) |
| 9. I think biological therapy for psoriasis treatment may lead to long-term weakening of the immune system. | 104 (18.71) | 104 (18.71) | 194 (34.89) | 84 (15.11) | 70 (12.59) |
| 10. I think biological therapy for psoriasis treatment may make patients' skin more fragile or sensitive. | 85 (15.29) | 83 (14.93) | 175 (31.47) | 112 (20.14) | 101 (18.17) |

**Supplement Table 3. Distribution of practice dimension responses**

|  | **Strongly agree** | **Agree** | **Neutral** | **Disagree** | **Strongly disagree** |
| --- | --- | --- | --- | --- | --- |
| 1. I will proactively introduce biological therapy to patients with psoriasis. | 231 (41.55) | 153 (27.52) | 139 (25.00) | 18 (3.24) | 15 (2.70) |
| 2. I can regularly monitor the progress of patients during biological therapy for psoriasis. | 211 (37.95) | 168 (30.22) | 135 (24.28) | 24 (4.32) | 18 (3.24) |
| 3. I will provide detailed information and education about biological therapy for psoriasis to the respective patients. | 220 (39.57) | 183 (32.91) | 113 (20.32) | 22 (3.96) | 18 (3.24) |
| 4. I will offer psychological support and counseling to patients with psoriasis to help them cope with emotional and psychological stress during treatment. | 248 (44.60) | 165 (29.68) | 116 (20.86) | 13 (2.34) | 14 (2.52) |
| 5. I can collaborate with other professionals to develop comprehensive treatment plans, including biological therapy, to maximally improve the condition and quality of life of patients. | 237 (42.63) | 176 (31.65) | 112 (20.14) | 18 (3.24) | 13 (2.34) |
| 6. I will provide patients with comprehensive information about the risks and side effects of biological therapy for psoriasis. | 243 (43.71) | 173 (31.12) | 108 (19.42) | 18 (3.24) | 14 (2.52) |
| 7. I will actively participate in research and academic exchanges on biological therapy for psoriasis. | 238 (42.81) | 166 (29.86) | 120 (21.58) | 15 (2.70) | 17 (3.06) |
| 8. I will encourage patients to actively participate in self-management and rehabilitation to enhance the effectiveness of biological therapy. | 259 (46.58) | 164 (29.50) | 108 (19.42) | 12 (2.16) | 13 (2.34) |
| 9. I will continuously update my professional knowledge and skills regarding biological therapy for psoriasis. | 251 (45.14) | 168 (30.22) | 111 (19.96) | 13 (2.34) | 13 (2.34) |
| 10. I will personalize the biological therapy treatment plan based on the specific circumstances and needs of patients. | 247 (44.42) | 157 (28.24) | 123 (22.12) | 15 (2.70) | 14 (2.52) |

**Supplement Table 4. Which of the following biologics are you familiar with**

|  | **No** | **Yes** |
| --- | --- | --- |
| a. TNF-α inhibitors | 309 (55.58) | 247 (44.42) |
| b. IL-17A inhibitors | 370 (66.55) | 186 (33.45) |
| c. IL-12/23 inhibitors | 426 (76.62) | 130 (23.38) |
| d. IL-23 inhibitors | 447 (80.40) | 109 (19.60) |
| e. Others | 475 (85.43) | 81 (14.57) |

**Supplement Table 5. What is the main source of your knowledge about psoriasis**

|  | **No** | **Yes** |
| --- | --- | --- |
| a. Professional study | 216 (38.85) | 340 (61.15) |
| b. Clinical practice | 303 (54.50) | 253 (45.50) |
| c. News media | 410 (73.74) | 146 (26.26) |
| d. Social interaction | 361 (64.93) | 195 (35.07) |
| e. Do not understand | 480 (86.33) | 76 (13.67) |

**Supplement Table 6. In which way would you prefer to learn about psoriasis biologics therapy**

|  | **No** | **Yes** |
| --- | --- | --- |
| a. Self-study | 273 (49.10) | 283 (50.90) |
| b. Offline lectures | 262 (47.12) | 294 (52.88) |
| c. Online lectures | 230 (41.37) | 326 (58.63) |
| d. Online courses | 276 (49.64) | 280 (50.36) |
| e. WeChat public account articles | 272 (48.92) | 284 (51.08) |
| f. Participation in case discussions | 297 (53.42) | 259 (46.58) |
| g. Other | 469 (84.35) | 87 (15.65) |
