# Supplementary material for: Knowledge, Attitudes, and Practices of Healthcare Professionals Regarding Psoriasis Biologic Therapy
Source: Research Square preprint supplement (doi:10.21203/rs.3.rs-7683165/v1), 2026-02-02
Supplement: Supplementary file 3 [file d5fcba8105fc907df40b07d1.docx]

**Supplementary Materials:**

**Supplement Figure 1. Distribution of medical professionals by department**

**Supplement Table 1. Distribution of knowledge dimension responses**

**Supplement Table 2. Distribution of attitude dimension responses**

**Supplement Table 3. Distribution of practice dimension responses**

**Supplement Table 4. Which of the following biologics are you familiar with**

**Supplement Table 5. What is the main source of your knowledge about psoriasis**

**Supplement Table 6. In which way would you prefer to learn about psoriasis biologics therapy**
